# Supplementary material
Source: HighWire-hosted journal article supplement (https://erj.ersjournals.com/content/52/1/1701637)
Supplement: inline-supplementary-material-2 [file inline-supplementary-material-2.pdf]

| Parameter                      | (n=278) | % of non-missing values |
|--------------------------------|---------|-------------------------|
| Median age (years)             | 66      |                         |
| Male Sex                       | 215     | 77                      |
| <b>Performance status</b>      |         |                         |
| ECOG 0                         | 48      | 17                      |
| ECOG I                         | 203     | 73                      |
| ECOG >II                       | 15      | 5                       |
| <b>Tumor stage</b>             |         |                         |
| Stage I                        | 192     | 69                      |
| Stage II                       | 59      | 21                      |
| Stage III                      | 27      | 10                      |
| <b>Tumor size</b>              |         |                         |
| pT1                            | 86      | 31                      |
| pT2                            | 170     | 61                      |
| pT3                            | 13      | 5                       |
| pT4                            | 7       | 2                       |
| <b>Tumor histology</b>         |         |                         |
| Squamous cell carcinoma        | 128     | 46                      |
| Adenocarcinoma                 | 108     | 39                      |
| Large cell carcinoma           | 42      | 15                      |
| <b>Tumor grading</b>           |         |                         |
| G1-G2                          | 102     | 37                      |
| G3-G4                          | 170     | 61                      |
| <b>Reptin H-score in NSCLC</b> |         |                         |
| H-score ≤ 160                  | 32      | 12                      |
| H-score > 160                  | 246     | 88                      |

### Supplementary Table S1:

Baseline characteristics of the study population (n = 278). For 12, 6 and 2 patients respectively data for ECOG status, tumour grading and tumour size was not available.
