# Supplementary material
Source: HighWire-hosted journal article supplement (https://erj.ersjournals.com/content/52/1/1701637)
Supplement: inline-supplementary-material-5 [file inline-supplementary-material-5.pdf]

**Figure S3**

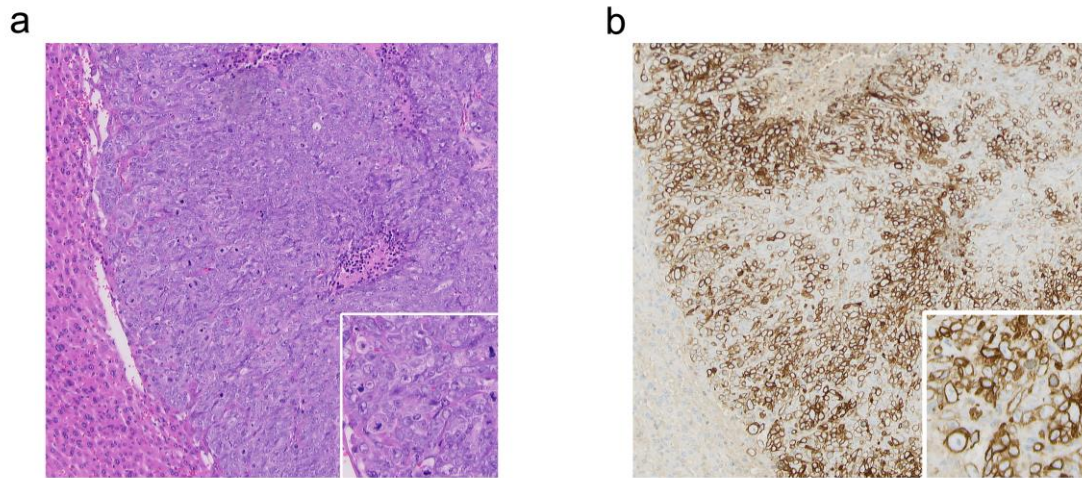

**Supplementary Fig. S3:** H&E staining and immunohistochemistry analysis showing infiltration of metastatic tissues from mice from control group with cells of human adenocarcinoma (**S3a**) with strong expression of human CK7 (**S3b**).
