# Supplementary material
Source: HighWire-hosted journal article supplement (https://erj.ersjournals.com/content/52/1/1701637)
Supplement: inline-supplementary-material-6 [file inline-supplementary-material-6.pdf]

## Figure S4

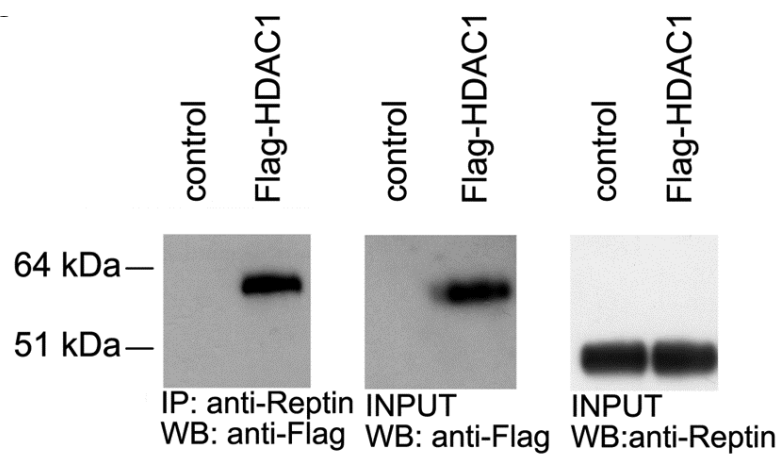

**Supplementary Fig. S4:** Reptin associates with HDAC1 in HEK-293 cells in a protein complex. Representative co-immunoprecipitation (CoIP) analysis of human HEK-293 cells in the presence or absence of Flag-tagged HDAC1 and according loading controls (input).
